# Supplementary material
Source: PubMed Central journal article supplement (PMC4163053)
Supplement: NIHMS625339-supplement-Supp__Material.pdf [file NIHMS625339-supplement-Supp__Material.pdf]

## Supplementary Online Content

Kris MG, Johnson BE, Berry LD, et al. Using Multiplexed Assays of Oncogenic Drivers in Lung Cancers to Select Targeted Drugs. *JAMA*.  
doi:10.1001/jama.2014.3741

**eTable 1.** Trials of targeted therapies available within the Lung Cancer Mutation Consortium

**eTable 2.** Numbers of patients enrolled for each oncogenic driver and specific agents used

**eTable 3.** Enrollment and genotyping frequencies by study site

**eTable 4.** Frequency of oncogenic drivers in all specimens in which a driver in a single gene was identified

**eTable 5.** Specific genetic aberrations in tumors with drivers in more than one gene – Any Genotyping group

**eTable 6.** Oncogenic drivers identified by cigarette smoking status: Never, Current, Former

**eFigure 1.** Status of All 1537 Patients Enrolled

**eFigure 2.** Frequency of Oncogenic Drivers Detected in the 733 Patients Tested for All 10 Drivers

**eFigure 3.** Survival by Oncogenic Driver for the 7 Drivers Identified in at Least 10 Patients

**eFigure 4.** Survival by Driver-Treatment Status in Patients With Full Genotyping (10 genes)

**eFigure 5.** Survival in Patients With Metastatic Cancer Diagnosed Within 6 Months Prior to Study Initiation

**eFigure 6.** Survival in Patients With Oncogenic Drivers Other Than EGFR or ALK

This supplementary material has been provided by the authors to give readers additional information about their work

© 2014 American Medical Association. All rights reserved.

eTable 1. Trials of targeted therapies available within the Lung Cancer Mutation Consortium

| <b>Gene target</b>                                | <b>Trial title (identifier)</b>                                                                                                                                                                                    | <b>Patient eligibility</b>                                                                                                                                                                                                                                                         |
|---------------------------------------------------|--------------------------------------------------------------------------------------------------------------------------------------------------------------------------------------------------------------------|------------------------------------------------------------------------------------------------------------------------------------------------------------------------------------------------------------------------------------------------------------------------------------|
| <b>ALK</b>                                        | Crizotinib (Xalkori®) Versus Standard Of Care In Patients With Advanced Non-Small Cell Lung Cancer (NSCLC) With A Specific Gene Profile Involving The Anaplastic Lymphoma Kinase (ALK) (NCT00932893)               | Patients with NSCLC who have previously been treated with chemotherapy, including at least one platinum agent (for example, carboplatin, cisplatin), and have the EML4-ALK gene rearrangement                                                                                      |
|                                                   | Crizotinib (Xalkori®) In Patients With Advanced Non-Small Cell Lung Cancer With A Specific Gene Profile Involving The Anaplastic Lymphoma Kinase (ALK) Gene (NCT00932451)                                          | Patients from study NCT00932893 whose disease progressed while receiving standard of care chemotherapy                                                                                                                                                                             |
| <b>PIK3CA</b>                                     | Safety and Efficacy of BKM120 in Patients With Metastatic Non-small Cell Lung Cancer (NCT01297491)                                                                                                                 | Patients with non-small cell lung cancer who have been previously treated with one or more therapies, and have a PIK3CA mutation                                                                                                                                                   |
| <b>BRAF V600E</b>                                 | A Phase II Study of the Selective BRAF Kinase Inhibitor GSK2118436 in Subjects With Advanced Non-small Cell Lung Cancer and BRAF Mutations (NCT01336634)                                                           | Patients with non-small cell lung cancer who have been previously treated with one or more therapies, and have the V600E BRAF mutation                                                                                                                                             |
| <b>BRAF (non V600E)<br/>KRAS<br/>NRAS<br/>MEK</b> | An Open-label Study of GSK1120212 Compared With Docetaxel in Stage IV KRAS-mutant Non-small Cell Lung Cancer (NCT01362296)                                                                                         | Patients with NSCLC who have previously been treated with chemotherapy, including at least one platinum agent (for example, carboplatin, cisplatin), and have a mutation in the KRAS, NRAS, MEK, or BRAF (non-V600E) gene                                                          |
| <b>KRAS</b>                                       | Erlotinib Plus ARQ 197 Versus Single Agent Chemotherapy in Locally Advanced or Metastatic Non-Small Cell Lung Cancer (NCT01395758)                                                                                 | Patients with non-small cell lung cancer who have been previously treated with one or more therapies, and have a mutation in the KRAS gene                                                                                                                                         |
| <b>EGFR</b>                                       | A Study of MM-121 Combination Therapy in Patients With Advanced Non-Small Cell Lung Cancer (NCT00994123)                                                                                                           | Patients with metastatic NSCLC and (1) EGFR mutation-positive NSCLC, with no prior EGFR-directed treatment; (2) EGFR mutation-negative NSCLC, with no prior EGFR-directed treatment; or (3) EGFR mutation-positive NSCLC with acquired resistance to prior EGFR-directed treatment |
|                                                   | Study of Erlotinib (Tarceva®) in Combination With OSI-906 in Patients With Advanced Non-small Cell Lung Cancer (NSCLC) With Activating Mutations of the Epidermal Growth Factor Receptor (EGFR) Gene (NCT01221077) | Patients with stage IIIB or IV NSCLC who have a mutation in the EGFR gene and have not received chemotherapy for advanced cancer; Patients who received chemotherapy before or after surgery, but had their disease progress anyway                                                |
| <b>HER2</b>                                       | PF-00299804 As A Single Oral Agent In Selected Patients With Adenocarcinoma Of The Lung (NCT00818441)                                                                                                              | Patients with locally advanced or metastatic adenocarcinoma with or without prior treatment who have a tumor with a mutation in or amplification of the HER2 gene                                                                                                                  |
| <b>MET</b>                                        | A Study Of Oral PF-02341066 (crizotinib), A c-Met/Hepatocyte Growth Factor Tyrosine Kinase Inhibitor, In Patients With Advanced Cancer (NCT00585195)                                                               | Patients with locally advanced or metastatic lung cancer and a verified amplification of or mutation in the MET gene                                                                                                                                                               |

eTable 2. Numbers of patients enrolled for each oncogenic driver and specific agents used

| Gene target (n=patients with testing) | Patients with mutation identified | Patients on targeted therapy | Distribution of targeted therapy                                  |                                                              |                            |
|---------------------------------------|-----------------------------------|------------------------------|-------------------------------------------------------------------|--------------------------------------------------------------|----------------------------|
| <i>AKT1</i> (n=941)                   | 0                                 | 0                            | N/A                                                               |                                                              |                            |
| <i>BRAF V600E</i> (n=949)             | 14                                | 2                            | AZD6244 (2)                                                       |                                                              |                            |
| <i>BRAF non-V600E</i> (n=950)         | 4                                 | 1                            | AZD6244 (1)                                                       |                                                              |                            |
| <i>EGFR</i> (sensitizing) (n=987)     | 175                               | 146                          | Afatinib (1)                                                      | Erlotinib (130)                                              | Erlotinib/OSI-906 (2)      |
|                                       |                                   |                              | Dacomitinib (2)                                                   | Erlotinib/HCQ (2)                                            | Gefitinib (1)              |
|                                       |                                   |                              | Afatinib/Cetuximab (1)                                            | Erlotinib/MM-121 (1)                                         | Multiple lines* (6)        |
| <i>EGFR</i> (other) (n=984)           | 35                                | 23                           | AUY922 (1)                                                        | Erlotinib (14)                                               | Neratinib/Temsirolimus (2) |
|                                       |                                   |                              | Dacomitinib (1)                                                   | Erlotinib/HCQ (1)                                            | Multiple lines* (2)        |
|                                       |                                   |                              | Erlotinib/MM-121 (1)                                              | Erlotinib/OSI906 (1)                                         |                            |
| <i>HER2</i> (n=920)                   | 23                                | 11                           | Dacomitinib (5)                                                   | Neratinib/Temsirolimus (2)                                   |                            |
|                                       |                                   |                              | Lapatinib/Trastuzumab/                                            | STA-9090 (1)                                                 |                            |
|                                       |                                   |                              | Bevacizumab (1)                                                   | Trastuzumab (2)                                              |                            |
| <i>KRAS</i> (n=981)                   | 245                               | 22                           | AUY922 (1)                                                        | Erlotinib/Tivantinib (3)                                     | LY2835219 (2)              |
|                                       |                                   |                              | AZD6244 (2)                                                       | Everolimus (2)                                               | Ridaforalimus (1)          |
|                                       |                                   |                              | Docetaxel/AZD6244 (1)                                             | GDC0941/GDC0973 (3)                                          | STA-9090 (3)               |
|                                       |                                   |                              | Erlotinib/AZD6244 (2)                                             | Imetelstat (1)                                               | MEK inhibitor (1)          |
| <i>MEK1</i> (n=939)                   | 2                                 | 0                            | N/A                                                               |                                                              |                            |
| <i>NRAS</i> (n=940)                   | 5                                 | 0                            | N/A                                                               |                                                              |                            |
| <i>PIK3CA</i> (n=945)                 | 7                                 | 0                            | N/A                                                               |                                                              |                            |
| <i>ALK</i> (n=926)                    | 80                                | 52                           | Crizotinib (51)                                                   | Crizotinib/LDK378 (1)                                        |                            |
| <i>MET</i> (n=833)                    | 6                                 | 3                            | Crizotinib (3)                                                    |                                                              |                            |
| Doubletons                            | 27                                | 15                           | ALK:Crizotinib (PF-02341066) (3)<br>EGFR:Erlotinib (Tarceva) (10) | MET/HER2:Crizotinib/Dacomitinib (1)<br>PIK3CA:GSK2141795 (1) |                            |

\*\*\*Multiple lines of therapy include erlotinib, dacomitinib, erlotinib/BMS-936558.

eTable 3. Enrollment and genotyping frequencies by study site

| Site                                   | Enrollment | Total number with any or full genotyping | Any Genotyping number (%) | Full Genotyping number (%) |
|----------------------------------------|------------|------------------------------------------|---------------------------|----------------------------|
| University of California, Los Angeles  | 104        | 50                                       | 8(16%)                    | 42(84%)                    |
| University of Colorado, Denver         | 264        | 188                                      | 48(25%)                   | 140(75%)                   |
| H. Lee Moffit Cancer Center            | 77         | 63                                       | 11(17%)                   | 52(83%)                    |
| Emory University                       | 71         | 42                                       | 4(10%)                    | 38(90%)                    |
| Massachusetts General Hospital         | 118        | 85                                       | 25(29%)                   | 60(70%)                    |
| Dana Farber Cancer Institute           | 322        | 184                                      | 25(14%)                   | 159(86%)                   |
| Johns Hopkins Medical Institute        | 87         | 49                                       | 12(24%)                   | 37(76%)                    |
| National Cancer Institute              | 16         | 13                                       | 13(100%)                  | 0(0%)                      |
| Memorial Sloan Kettering Cancer Center | 190        | 173                                      | 48(28%)                   | 125(72%)                   |
| Pittsburgh Cancer Institute            | 20         | 9                                        | 1(11%)                    | 8(88%)                     |
| Medical University of South Carolina   | 16         | 3                                        | 3(100%)                   | 0(0%)                      |
| Vanderbilt-Ingram Cancer Center        | 60         | 47                                       | 41(87%)                   | 6(13%)                     |
| University of Texas, Southwestern      | 53         | 40                                       | 11(27%)                   | 29(73%)                    |
| MD Anderson Cancer Center              | 139        | 61                                       | 24(39%)                   | 37(27%)                    |
| <b>Totals</b>                          | 1537       | 1007                                     | 274                       | 733                        |
| <b>Median %</b>                        |            |                                          | 25%                       | 73%                        |
| <b>Range</b>                           |            |                                          | 10%-100%                  | 0%-90%                     |

eTable 4. Frequency of oncogenic drivers in all specimens in which a driver in a single gene was identified\*

\*To reconcile counts presented here with Table 2, all occurrences of each mutation, alone and/or in combination with other mutations, must be considered. For example,

*EGFR* exon19 deletions appears with a count of 102 alone, plus an additional occurrence in combination with *G719A*, for a total count of 103, as presented in Table 2; the instances of exon 19 deletion with *T790M*, as presented in this table, is accounted for among the *EGFR* "other" mutations in Table 2, as explained in the footnote to that table that describes the categorization of *EGFR* mutation types.

| Gene (n=cases tested)    | Amino Acid Mutant        | Nucleotide Mutant               | Frequency      |
|--------------------------|--------------------------|---------------------------------|----------------|
| <b>BRAF</b><br>(n=951)   | G469A                    | G469 BRAF_c.1406G.C             | 2              |
|                          | G469V                    | G466 BRAF_c.1406G.T             | 1              |
|                          | V600E                    | BRAF_c.1799T.A                  | 14             |
|                          | n/a                      | BRAF other                      | 1              |
| <b>EGFR</b><br>(n=987)   | G719S                    | EGFR_c.2155G.A                  | 1              |
|                          | G719C plus S768I         | EGFR_c.2155G.T, EGFR_c.2303G.T  | 3              |
|                          | G719A                    | EGFR_c.2156G.C                  | 2              |
|                          | G719A plus L861Q         | EGFR_c.2156G.C,EGFR_c.2582T.A   | 1              |
|                          | G719A plus exon 19 del   | EGFR_c.2156G.C,EGFR_exon.19.del | 1              |
|                          | T790M plus L858R p.L858R | EGFR_c.2369C.T,EGFR_c.2573T.G   | 5              |
|                          | T790M plus exon 19 del   | EGFR_c.2369C.T,EGFR_exon.19.del | 3              |
|                          | L858R                    | EGFR_c.2573T.G                  | 64             |
|                          | L861Q                    | EGFR_c.2582T.A                  | 4              |
|                          | exon 19 del              | EGFR_exon.19.del                | 102            |
|                          | exon 20 ins              | EGFR_exon.20.ins                | 22             |
|                          | n/a                      | EGFR other                      | 1              |
|                          | <b>HER2</b><br>(n=920)   | exon 20 ins                     | ERBB2_ins.A775 |
| <b>MEK1</b><br>(n=939)   | K57N                     | MEK1_c.171G.T                   | 2              |
| <b>PIK3CA</b><br>(n=945) | E545K                    | PIK3CA_c.1633G.A                | 5              |
|                          | H1047R                   | PIK3CA_c.3140A.G                | 2              |
| <b>KRAS</b><br>(n=981)   | Q61R                     | KRAS_c.182A.G                   | 1              |
|                          | Q61L                     | KRAS_c.182A.T                   | 1              |
|                          | Q61H                     | KRAS_c.183A.C                   | 5              |
|                          | Q61H                     | KRAS_c.183A.T                   | 5              |
|                          | Q61H plus G13C           | KRAS_c.183A.T,KRAS_c.37G.T      | 1              |
|                          | G12S                     | KRAS_c.34G.A                    | 7              |
|                          | G12R                     | KRAS_c.34G.C                    | 5              |
|                          | G12C                     | KRAS_c.34G.T                    | 98             |
|                          | G12C plus G12V           | KRAS_c.34G.T,KRAS_c.35G.T       | 2              |
|                          | G12D                     | KRAS_c.35G.A                    | 54             |
|                          | G12D plus G13C           | KRAS_c.35G.A,KRAS_c.37G.T       | 1              |
|                          | G12A                     | KRAS_c.35G.C                    | 12             |
|                          | G12V                     | KRAS_c.35G.T                    | 37             |
|                          | G13C                     | KRAS_c.37G.T                    | 7              |
|                          | G13D                     | KRAS_c.38G.A                    | 7              |
|                          | G13V                     | KRAS_c.38G.T                    | 1              |
|                          | G 13R                    | KRAS_c.37G.C                    | 1              |
| <b>NRAS</b><br>(n=940)   | Q61K                     | NRAS_c.181C.A                   | 1              |
|                          | Q61R                     | NRAS_c.182A.G                   | 2              |
|                          | Q61L                     | NRAS_c.182A.T                   | 1              |
|                          | G12R                     | NRAS_c.34G.C                    | 1              |

eTable 5. Specific genetic aberrations in tumors with drivers in more than one gene – Any Genotyping group

|                                                                                           | Gene 1            | Gene 2                             | Frequency |
|-------------------------------------------------------------------------------------------|-------------------|------------------------------------|-----------|
| <b>Double oncogenic driver:<br/><i>PIK3CA</i> and another mutation</b>                    | PIK3CA E542K      | BRAF V600E                         | 1         |
|                                                                                           | PIK3CA E545K      | BRAF V600E                         | 1         |
|                                                                                           | PIK3CA E542K      | EGFR L858R                         | 1         |
|                                                                                           | PIK3CA E542K      | EGFR exon 19 del                   | 1         |
|                                                                                           | PIK3CA E542K      | EGFR other                         | 1         |
|                                                                                           | PIK3CA H1047Y     | EGFR L858R                         | 1         |
|                                                                                           | PIK3CA H1047R     | EGFR exon 19 del                   | 3         |
|                                                                                           | PIK3CA H1047R     | EGFR exon 20 ins                   | 1         |
|                                                                                           | PIK3CA H1047L     | EGFR exon 19 del                   | 1         |
|                                                                                           | PIK3CA E545K      | KRAS G12D                          | 1         |
|                                                                                           | PIK3CA H1047R     | MEK1 K57N                          | 1         |
| <b>Double oncogenic driver:<br/><i>MET</i> amplification and another mutation</b>         | MET amplification | EGFR L858R                         | 1         |
|                                                                                           | MET amplification | EGFR exon 19 del                   | 1         |
|                                                                                           | MET amplification | HER2 exon 20 ins<br>ERBB2_ins.A775 | 1         |
|                                                                                           | MET amplification | KRAS G12C                          | 2         |
|                                                                                           | MET amplification | KRAS G12A                          | 1         |
|                                                                                           | MET amplification | KRAS G12V                          | 1         |
| <b>Double oncogenic driver:<br/><i>ALK</i> rearrangement and another mutation</b>         | ALK rearrangement | BRAF V600E                         | 1         |
|                                                                                           | ALK rearrangement | EGFR L858R                         | 1         |
|                                                                                           | ALK rearrangement | EGFR L861Q                         | 1         |
|                                                                                           | ALK rearrangement | EGFR exon 19 del                   | 1         |
| <b>Double oncogenic driver:<br/><i>ALK</i> rearrangement and <i>MET</i> amplification</b> | MET amplification | ALK rearrangement                  | 2         |
| <b>Double oncogenic driver:<br/>Two genes other than <i>PIK3CA</i></b>                    | AKT E17K          | EGFR exon 19 del                   | 1         |

eTable 6. Oncogenic drivers identified by cigarette smoking status\*: Never, Current, Former

| Gene with mutational or structural change            |                                 | Current Smokers                                 | Former Smokers                                   | Never Smokers                                    |
|------------------------------------------------------|---------------------------------|-------------------------------------------------|--------------------------------------------------|--------------------------------------------------|
|                                                      |                                 | Driver in indicated gene<br>(n=73)<br>Count (%) | Driver in indicated gene<br>(n=589)<br>Count (%) | Driver in indicated gene<br>(n=341)<br>Count (%) |
| Any gene(s)                                          |                                 | 45 (62%)                                        | 340 (58%)                                        | 238 (70%)                                        |
| S<br>I<br>N<br>G<br>L<br>E<br>T<br>O<br>N<br>S<br>** | <i>KRAS</i>                     | 33 (45%)                                        | 198 (34%)                                        | 14 (4%)                                          |
|                                                      | <i>EGFR</i><br>(sensitizing)*** | 4 (5%)                                          | 59 (10%)                                         | 114 (33%)                                        |
|                                                      | exon19 del                      | 4 (5%)                                          | 29 (5%)                                          | 70 (21%)                                         |
|                                                      | <i>L858R</i>                    | 0 (0%)                                          | 24 (4%)                                          | 40 (12%)                                         |
|                                                      | <i>G719X</i>                    | 0 (0%)                                          | 3 (1%)                                           | 2 (1%)                                           |
|                                                      | <i>L861Q</i>                    | 0 (0%)                                          | 3 (1%)                                           | 2 (1%)                                           |
|                                                      | <i>ALK</i><br>(rearrangement)   | 3 (4%)                                          | 26 (4%)                                          | 51 (15%)                                         |
|                                                      | <i>EGFR</i> (other)****         | 0 (0%)                                          | 14 (2%)                                          | 21 (6%)                                          |
|                                                      | <i>HER2</i>                     | 1 (1%)                                          | 6 (1%)                                           | 16 (5%)                                          |
|                                                      | <i>BRAF</i>                     | 2 (3%)                                          | 13 (2%)                                          | 3 (1%)                                           |
|                                                      | <i>V600E</i>                    | 1 (1%)                                          | 10 (2%)                                          | 3 (1%)                                           |
|                                                      | Non- <i>V600E</i>               | 1 (1%)                                          | 3 (1%)                                           | 0 (0%)                                           |
|                                                      | <i>PIK3CA</i>                   | 0 (0%)                                          | 4 (1%)                                           | 3 (1%)                                           |
|                                                      | <i>MET</i> (amplification)      | 1 (1%)                                          | 4 (1%)                                           | 1 (0%)                                           |
| <i>NRAS</i>                                          | 0 (0%)                          | 5 (1%)                                          | 0 (0%)                                           |                                                  |
| <i>MEK1</i>                                          | 0 (0%)                          | 2 (0%)                                          | 0 (0%)                                           |                                                  |
| <i>AKT1</i>                                          | 0 (0%)                          | 0 (0%)                                          | 0 (0%)                                           |                                                  |
| >1 gene<br>(doubletons)                              | 1 (1%)                          | 11 (2%)                                         | 15 (4%)                                          |                                                  |

\*Patient smoking status from Any Genotyping group; as not all cases in this group were tested for all genes, percentages therefore reflect rate of detection of mutation where non-detection is a combination of negative findings and no findings.

\*\*Per-gene count (percent) of patients with mutations occurring in a single gene (Singletons) . Patients with oncogenic drivers in more than one gene (Doubletons) are included as their own category. For detailed information on mutations occurring within Doubletons, see eTable 5.

\*\*\*The sum of counts for the four categories of *EGFR*-sensitizing mutations differs from the patient-level count of total number of patients with *EGFR*-sensitizing mutations due to two patients with the co-occurrence of two different sensitizing mutations in the same specimen.

\*\*\*\*Patients are counted in the *EGFR* (other) group based on a finding of any one or more mutations in *EGFR* other than exon 19 deletions, *L858R*, *G719X*, or *L861Q*, with or without co-occurrence in the same case of one of these sensitizing mutations. See eTable 5 for detailed count of co-occurring *EGFR* mutations.



**eFigure 1.** Status of All 1537 Patients Enrolled

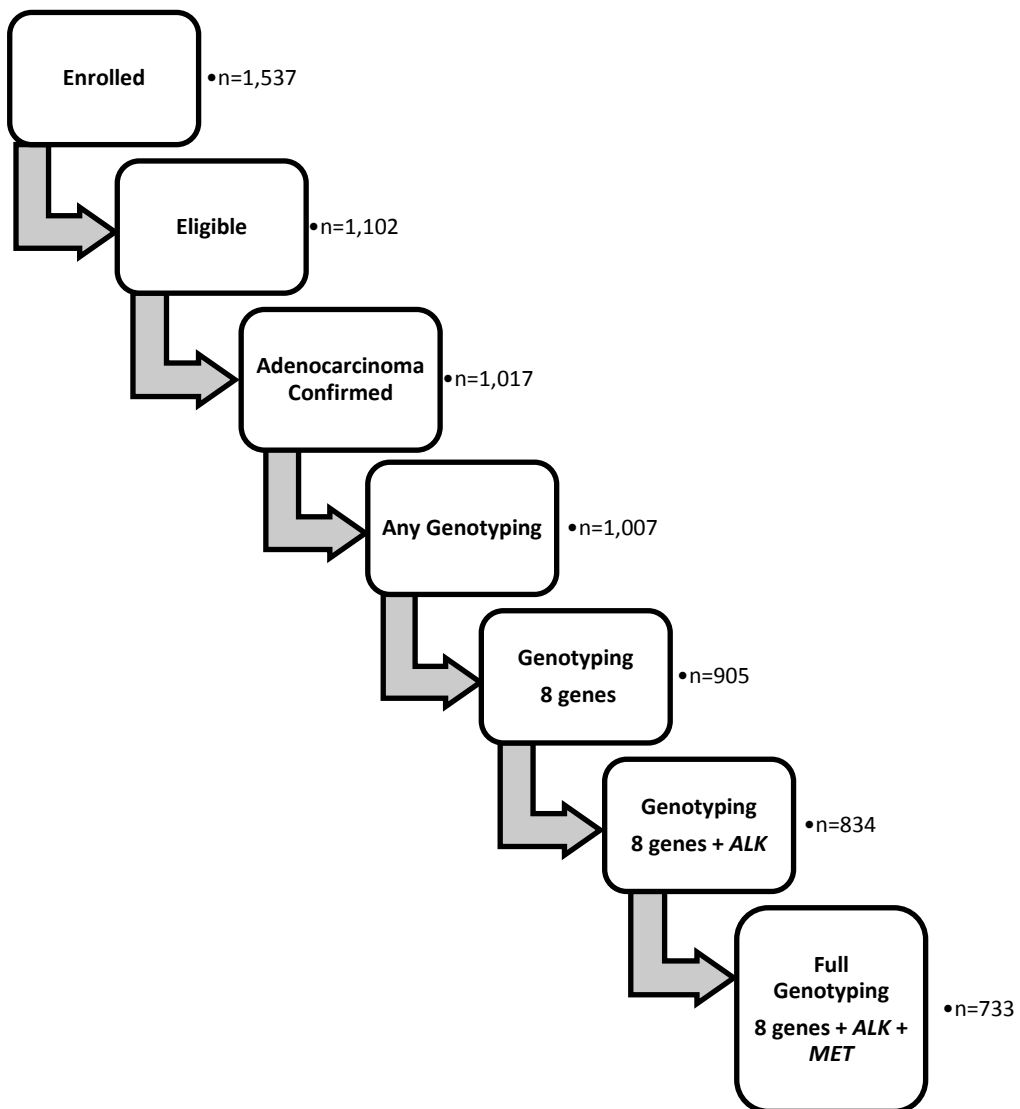

Patient flow from enrollment through screening, pathology review, and genotyping.

**eFigure 2.** Frequency of Oncogenic Drivers Detected in the 733 Patients Tested for All 10 Drivers

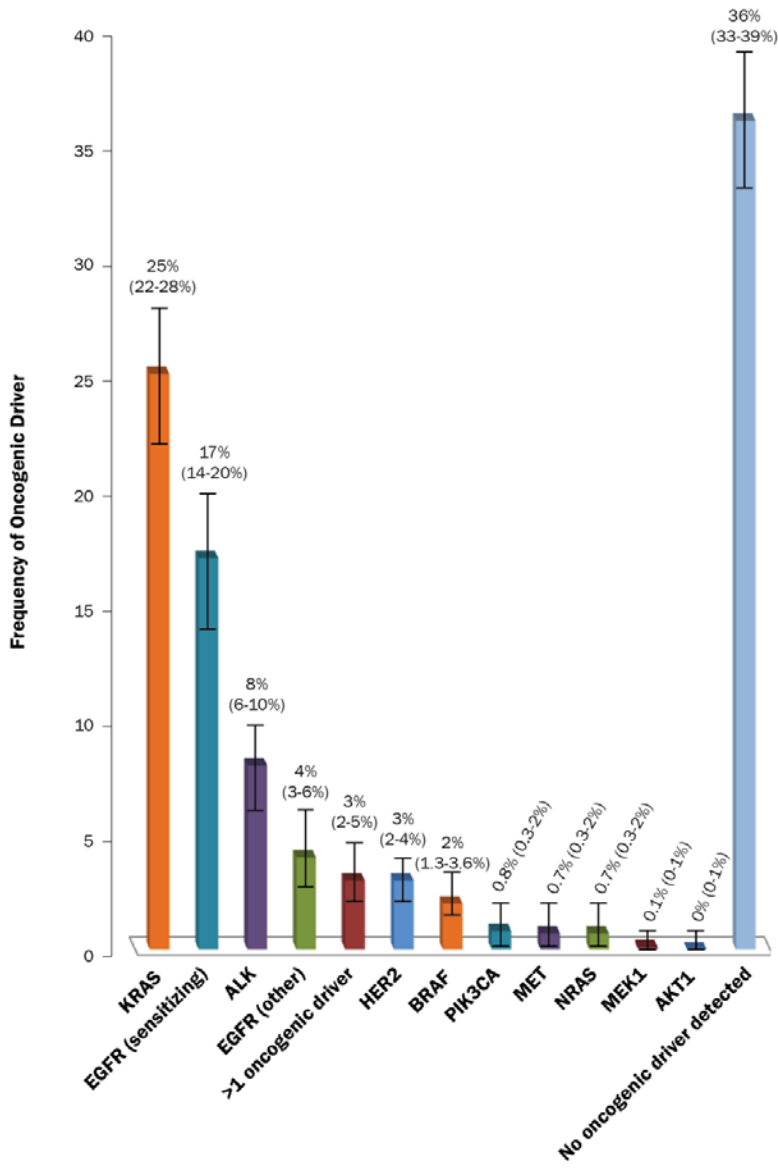

Frequency of oncogenic drivers detected in the 733 patients tested for all 10 drivers (Full Genotyping group)

**eFigure 3.** Survival by Oncogenic Driver for the 7 Drivers Identified in at Least 10 Patients

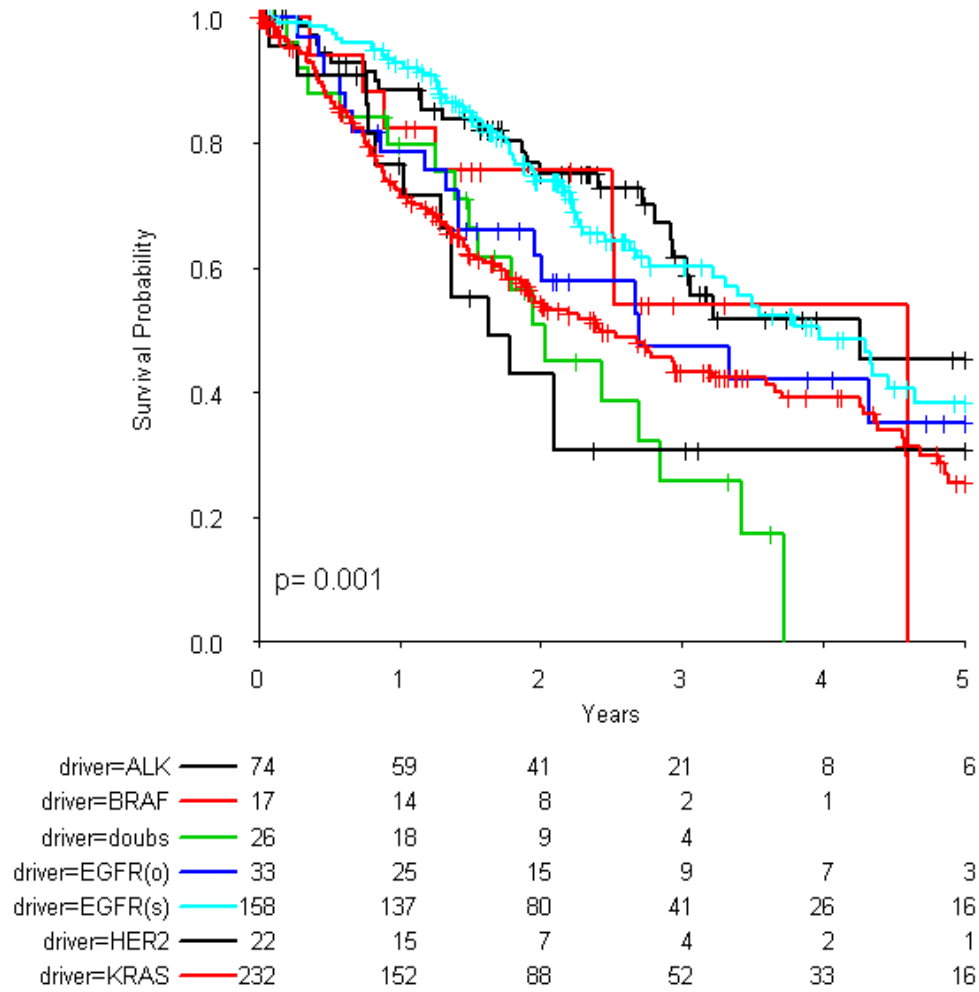

Comparison of survival among patients with an oncogenic driver detected, including all oncogenic driver genes with lesions detected in at least 10 patients. Median survival (95% CI): EGFR (sensitizing), 3.97 (3.21-4.64); EGFR (other), 2.70 (1.42-NA); ALK, 4.25 (2.92-NA); KRAS, 2.41 (1.87-3.21); doubletons, 2.03 (1.39-2.84); HER2, 1.63 (1.03-NA); BRAF, 4.59 (1.25-NA);  $p=0.001$  (log-rank test). Vertical tick-marks indicate censoring events.

**eFigure 4.** Survival by Driver-Treatment Status in Patients With Full Genotyping (10 genes)

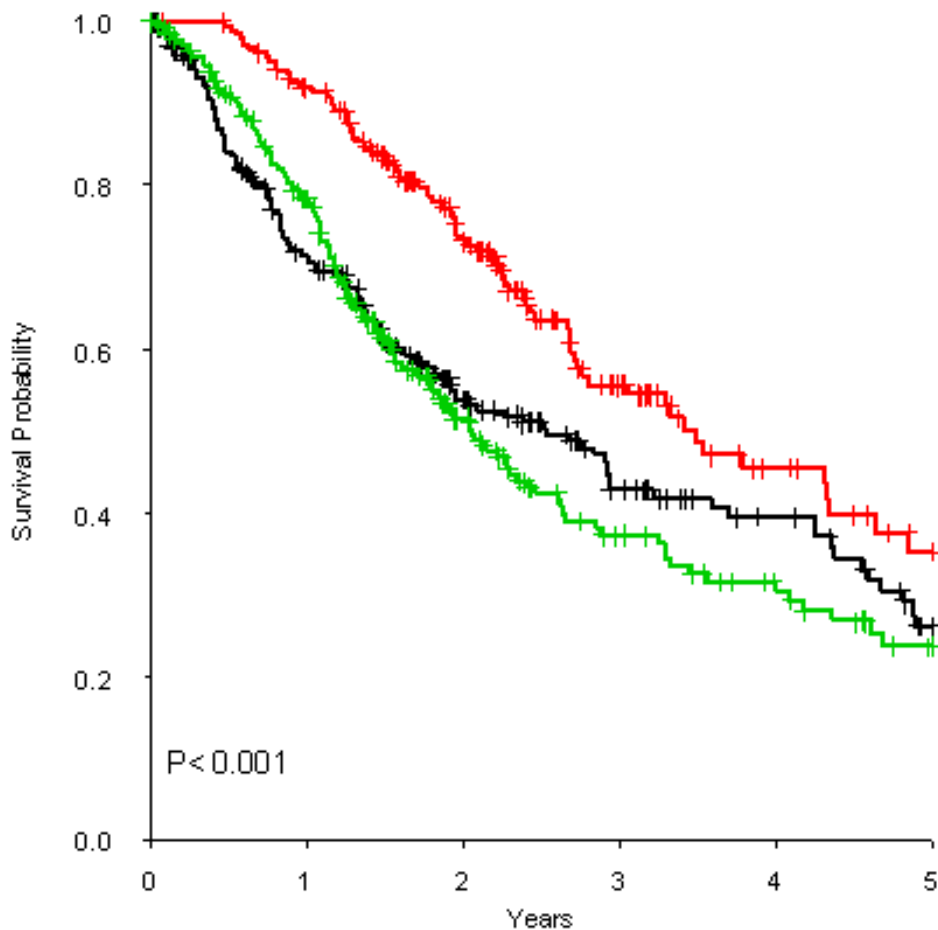

|                     |   |     |     |     |    |    |    |
|---------------------|---|-----|-----|-----|----|----|----|
| tx.group=driverNoTx | — | 248 | 157 | 85  | 48 | 33 | 15 |
| tx.group=driverTx   | — | 190 | 167 | 109 | 50 | 26 | 15 |
| tx.group=noDriver   | — | 251 | 177 | 81  | 42 | 27 | 14 |

Among patients with Full Genotyping, comparison of those with a driver detected and treated with a targeted therapy, against those with a driver detected and not treated with a targeted therapy. Survival of patients with no oncogenic driver identified also included. Median survival (95% CI): driver, no targeted therapy, 2.53 (1.85-3.21); driver, targeted therapy, 3.49 (2.71-4.33); no oncogenic driver identified, 2.05 (1.70-2.46);  $p < 0.001$  (log-rank test). Vertical tick-marks indicate censoring events.

**eFigure 5.** Survival in Patients With Metastatic Cancer Diagnosed Within 6 Months Prior to Study Initiation

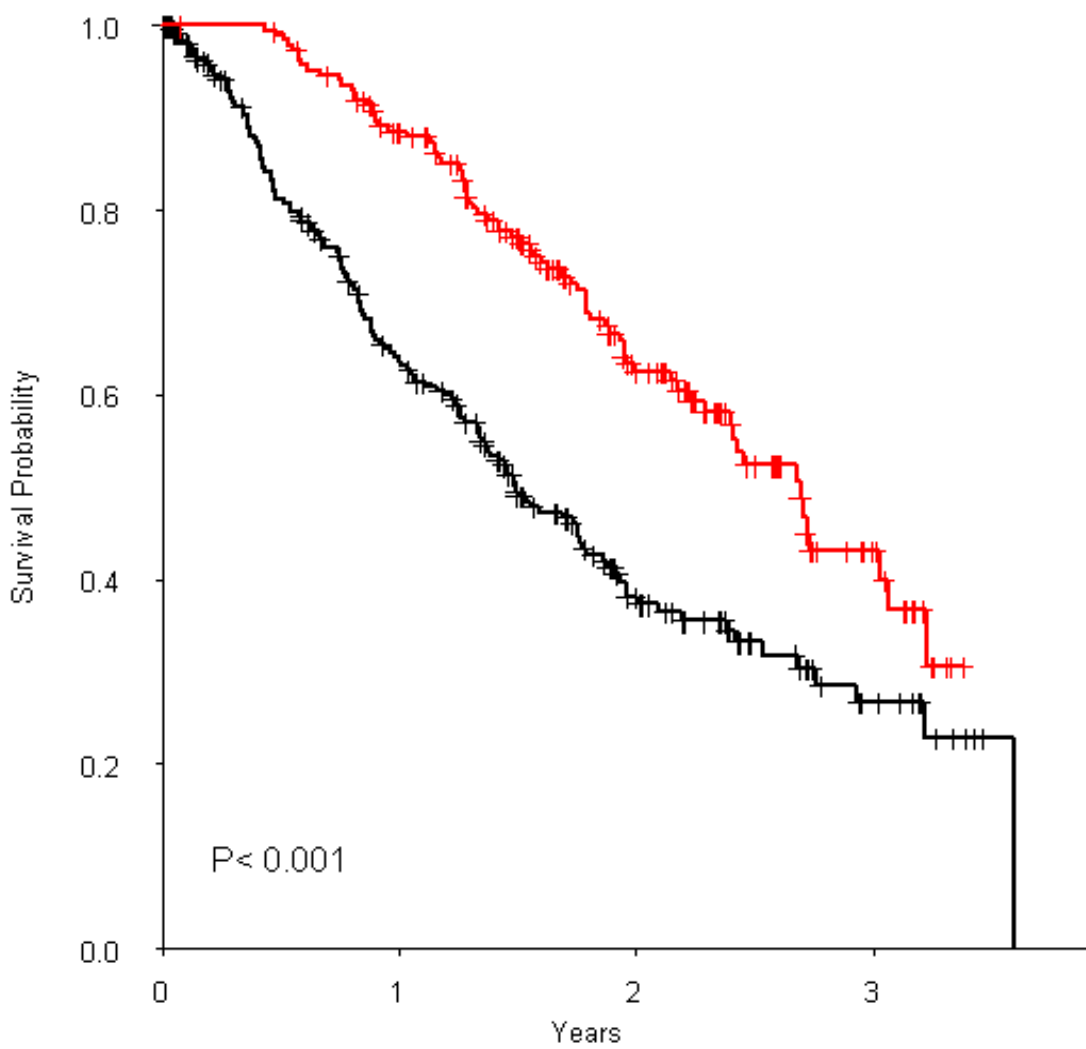

|                     |   |     |     |    |    |
|---------------------|---|-----|-----|----|----|
| tx.group=driverNoTx | — | 253 | 140 | 47 | 12 |
| tx.group=driverTx   | — | 189 | 154 | 73 | 15 |

Among patients with metastatic disease diagnosed  $\leq 6$  months prior to study initiation (September 1, 2009), comparison of those with a driver detected and treated with a targeted therapy, against those with a driver detected and not treated with a targeted therapy. Median survival (95%CI): driver, no targeted therapy, 1.49 (1.33-1.79); driver, targeted therapy, 2.69 (2.29-3.06);  $p < 0.001$  (log-rank test). Vertical tick-marks indicate censoring events.

**eFigure 6.** Survival in Patients With Oncogenic Drivers Other Than *EGFR* or *ALK*

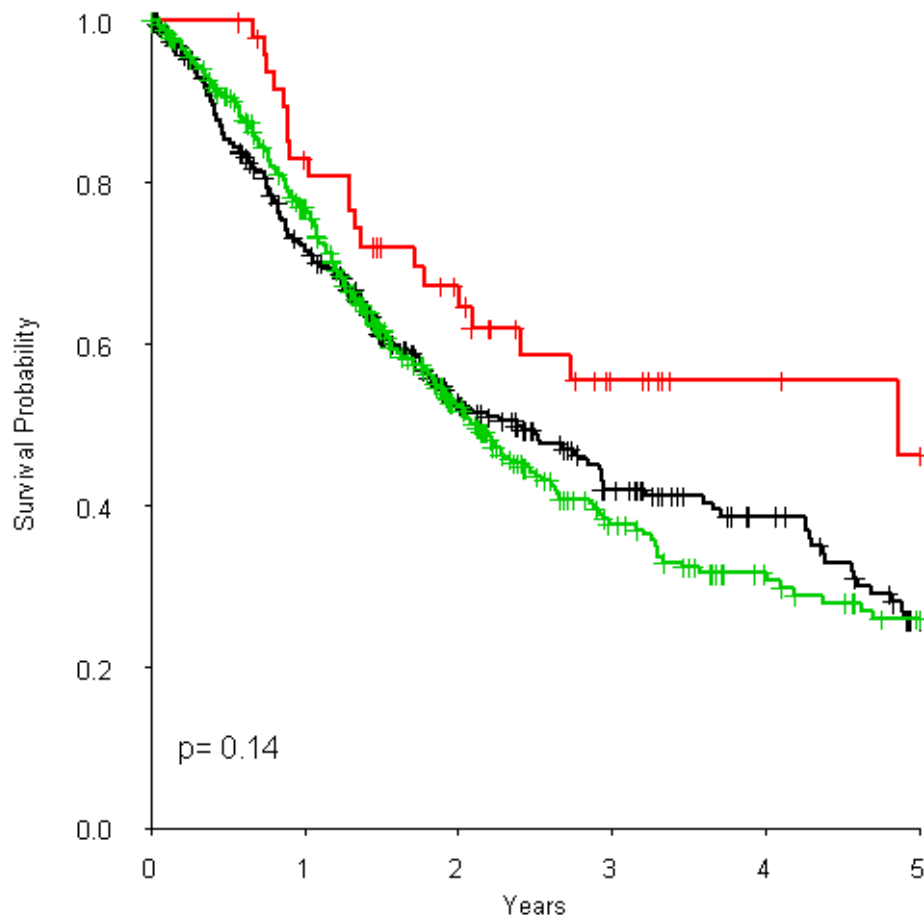

|                     |   |     |     |     |    |    |    |
|---------------------|---|-----|-----|-----|----|----|----|
| tx.group=driverNoTx | — | 318 | 205 | 110 | 64 | 43 | 20 |
| tx.group=driverTx   | — | 49  | 38  | 26  | 13 | 7  | 5  |
| tx.group=noDriver   | — | 360 | 250 | 122 | 59 | 36 | 23 |

Comparison of survival of patients with an oncogenic driver other than *EGFR* or *ALK* and treated with a targeted therapy, against those with an oncogenic driver and no targeted therapy. Survival of patients with no oncogenic driver identified also displayed. Median survival (95% CI): driver, no targeted therapy, 2.38 (1.81-2.93); driver, targeted therapy, 4.85 (2.00-NA); no oncogenic driver identified, 2.08 (1.84-2.46);  $p=0.14$  (log-rank test). Vertical tick-marks indicate censoring events.
